# Supplementary material for: Thickness of the divide and flank of the West Antarctic Ice Sheet through the last deglaciation
Source: Copernicus journal article supplement (doi:10.5194/tc-13-3061-2019), 2019-11-20
Supplement: Supplementary file 1 [file data_table_v2.xlsx]

## Sheet: Mount Axtell
Sample	Latitude (DD)	Longitude (DD)	Elevation (m)	Height above ice surface (m)	Thickness (cm)	Density (g cm^-3)	Topographic shielding	[Be-10] (10^4 atoms g^-1)	[Be-10] error (10^4 atoms g^-1)	Exposure age (years)	Internal uncertainty (years)	External uncertainty (years)	ICE-D: ANTARCTICA URL
13-NTK-013-PRT	-81.1464	-85.353	1484.6	317.6	5.5	2.58	0.90834	33.923	1.90761	17951	1014	1470	http://antarctica.ice-d.org/sample/13-NTK-013-PRT
13-NTK-019-PRT	-81.1463	-85.3516	1470.2	303.2	4.25	2.6	0.9696	28.9945	1.60565	14388	800	1168	http://antarctica.ice-d.org/sample/13-NTK-019-PRT
13-NTK-011-PRT	-81.1458	-85.3484	1420	253	3.5	2.56	0.97216	36.4509	2.13034	18740	1100	1564	http://antarctica.ice-d.org/sample/13-NTK-011-PRT
13-NTK-009-PRT	-81.1452	-85.3447	1382.8	215.8	3.25	2.58	0.8576	133.461	7.85019	81545	4896	6934	http://antarctica.ice-d.org/sample/13-NTK-009-PRT
13-NTK-026-PRT	-81.1447	-85.3403	1338.6	171.6	3.5	2.59	0.98317	465.996	24.8245	271199	15472	23087	http://antarctica.ice-d.org/sample/13-NTK-026-PRT
13-NTK-025-PRT	-81.144	-85.3261	1254.5	87.5	3.5	2.58	0.97519	19.9842	1.12537	11749	664	961	http://antarctica.ice-d.org/sample/13-NTK-025-PRT
13-NTK-029-PRT-ERR	-81.1476	-85.3043	1220	63	4.5	2.58	1	111.518	6.98838	67679	4314	5925	http://antarctica.ice-d.org/sample/13-NTK-029-PRT-ERR

## Sheet: Mount Tidd
Sample	Latitude (DD)	Longitude (DD)	Elevation (m)	Height above ice surface (m)	Thickness (cm)	Density (g cm^-3)	Topographic shielding	[Be-10] (10^4 atoms g^-1)	[Be-10] error (10^4 atoms g^-1)	Exposure age (years)	Internal uncertainty (years)	External uncertainty (years)	ICE-D: ANTARCTICA URL
13-NTK-022-PRT	-81.1322	-85.3628	1347.6	173.6	4	2.61	0.99398	12.8118	0.726721	6859	390	562	http://antarctica.ice-d.org/sample/13-NTK-022-PRT
13-NTK-020-PRT	-81.1332	-85.3556	1237.6	63.6	5.5	2.58	0.94789	6.78759	0.394122	4225	246	350	http://antarctica.ice-d.org/sample/13-NTK-020-PRT

## Sheet: Mount Turcotte
Sample	Latitude (DD)	Longitude (DD)	Elevation (m)	Height above ice surface (m)	Thickness (cm)	Density (g cm^-3)	Topographic shielding	[Be-10] (10^4 atoms g^-1)	[Be-10] error (10^4 atoms g^-1)	Exposure age (years)	Internal uncertainty (years)	External uncertainty (years)	ICE-D: ANTARCTICA URL
16-PRT-002-TCR	-81.1037	-85.5091	1321	91	3.5	2.61	0.96098	163.13	3.71485	94358	2200	6110	http://antarctica.ice-d.org/sample/16-PRT-002-TCR
16-PRT-004-TCR	-81.104	-85.5145	1358	128	3	2.6	0.99335	602.542	7.33265	346396	4602	22783	http://antarctica.ice-d.org/sample/16-PRT-004-TCR
16-PRT-007-TCR	-81.1045	-85.5202	1405	175	3	2.61	0.98666	26.7529	0.528464	13641	270	852	http://antarctica.ice-d.org/sample/16-PRT-007-TCR
16-PRT-008-TCR	-81.1045	-85.5202	1406	176	4.5	2.59	0.98666	1580.22	11.1624	1048456	9735	81889	http://antarctica.ice-d.org/sample/16-PRT-008-TCR
16-PRT-010-TCR	-81.1046	-85.5213	1418	188	3.5	2.61	0.97021	452.867	5.36355	248342	3132	15911	http://antarctica.ice-d.org/sample/16-PRT-010-TCR
16-PRT-042-TCT	-81.1092	-85.5368	1484	254	3.5	2.61	0.95297	244.353	6.33564	125173	3349	8325	http://antarctica.ice-d.org/sample/16-PRT-042-TCT
16-PRT-045-TCT	-81.1095	-85.5276	1373	143	2.5	2.61	0.93987	178.882	2.04937	100548	1181	6198	http://antarctica.ice-d.org/sample/16-PRT-045-TCT
16-PRT-046-TCT	-81.1102	-85.5197	1323	93	3	2.6	0.97429	313.706	4.53461	181914	2753	11568	http://antarctica.ice-d.org/sample/16-PRT-046-TCT
16-PRT-048-TCR	-81.1048	-85.5268	1451	221	5.5	2.62	0.98451	559.611	6.68409	303004	3908	19693	http://antarctica.ice-d.org/sample/16-PRT-048-TCR

## Sheet: Whitmore Mountains
Sample	Latitude (DD)	Longitude (DD)	Elevation (m)	Height above ice surface (m)	Thickness (cm)	Density (g cm^-3)	Topographic shielding	Qtz (g)	C Yield (micrograms)	Error C Yield (micrograms)	Diluted C (micrograms)	Error Diluted C (micrograms)	14C/13C corrected	Error 14C/13C corrected	d13C (permil)	Error d13C (permil)	14C/C total	Error 14C/C total	Total 14C atoms (blank corrected)	Error total 14C atoms (blank corrected)	[14C] sample (atoms/g)	Error [14C] sample (atoms/g)	Effective blank (atoms)	Error effective Blank (atoms)	Effective blank as % of total 14C atoms in sample	ICE-D: ANTARCTICA URL
13-NTK-036-WHT	-82.4301	-104.072	2245.7	10.7	2.7	2.6	0.99413	5.1277	20.8	0.26637	104.4	1.33697	6.99718e-11	2.11232e-13	-6.33631	0.5	7.66314e-13	2.33346e-15	3.94666e+06	6846.8	769675	10106.8	64684	6846.8	1.61253	http://antarctica.ice-d.org/sample/13-NTK-036-WHT
13-NTK-037-WHT	-82.4304	-104.07	2265.4	30.4	3	2.55	0.99612	5.0156	11.4	0.145991	104.4	1.33697	6.52502e-11	1.67918e-13	-5.74066	0.5	7.15028e-13	1.86203e-15	3.6782e+06	6846.8	733352	9653.65	64684	6846.8	1.72819	http://antarctica.ice-d.org/sample/13-NTK-037-WHT
13-NTK-038-WHT	-82.4322	-104.056	2367.6	132.6	4	2.68	0.99562	5.158	17.3	0.221548	92.5	1.18458	8.64314e-11	2.10912e-13	-6.74383	0.5	9.46192e-13	2.33954e-15	4.32369e+06	6846.8	838249	10976	64684	6846.8	1.47399	http://antarctica.ice-d.org/sample/13-NTK-038-WHT
13-NTK-039-WHT	-82.4337	-104.046	2422	187	2	2.62	0.99041	5.0497	23.6	0.302227	112.4	1.43942	8.63006e-11	2.07998e-13	-5.71691	0.5	9.45726e-13	2.31023e-15	5.26516e+06	6846.8	1.04267e+06	13584.5	64684	6846.8	1.21362	http://antarctica.ice-d.org/sample/13-NTK-039-WHT
13-NTK-040-WHT	-82.434	-104.042	2446.4	211.4	1.8	2.57	0.99583	5.1544	30.1	0.385468	103.9	1.33057	1.0445e-10	2.60285e-13	-6.60803	0.5	1.14361e-12	2.88598e-15	5.89296e+06	6846.8	1.14329e+06	14861.4	64684	6846.8	1.08573	http://antarctica.ice-d.org/sample/13-NTK-040-WHT
13-NTK-041-WHT	-82.4347	-104.042	2470.7	235.7	2	2.64	0.99631	4.9824	10.4	0.133185	260.8	3.33987	3.08093e-11	1.07125e-13	-2.11422	0.5	3.38834e-13	1.18581e-15	4.36606e+06	6846.8	876297	11470.9	64684	6846.8	1.45989	http://antarctica.ice-d.org/sample/13-NTK-041-WHT
13-NTK-042-WHT	-82.4351	-104.026	2530.4	295.4	3.25	2.61	0.99485	3.5114	7.3	0.0934856	111.1	1.42277	5.1641e-11	1.45769e-13	-2.77258	0.5	5.67565e-13	1.61792e-15	3.09696e+06	6846.8	881972	11694.4	64684	6846.8	2.0459	http://antarctica.ice-d.org/sample/13-NTK-042-WHT
13-NTK-043-WHT	-82.4359	-104.007	2626.5	391.5	3.5	2.51	0.98973	5.0198	20.9	0.267651	108.1	1.38436	9.92137e-11	1.97569e-13	-6.49663	0.5	1.08639e-12	2.20624e-15	5.82368e+06	6846.8	1.16014e+06	15083.9	64684	6846.8	1.09851	http://antarctica.ice-d.org/sample/13-NTK-043-WHT
13-NTK-044-WHT	-82.4363	-103.986	2765.3	530.3	3.5	2.6	0.99541	3.51	13.5	0.172884	109	1.39588	7.02151e-11	1.5667e-13	-5.47022	0.5	7.69642e-13	1.74444e-15	4.14159e+06	6846.8	1.17994e+06	15470.1	64684	6846.8	1.5378	http://antarctica.ice-d.org/sample/13-NTK-044-WHT
13-NTK-045-WHT	-82.4357	-103.99	2729.3	494.3	2.75	2.6	0.99061	5.0469	28.9	0.370101	111	1.42149	1.13181e-10	3.12551e-13	-5.57812	0.5	1.24047e-12	3.46093e-15	6.83918e+06	6846.8	1.35513e+06	17570.7	64684	6846.8	0.936924	http://antarctica.ice-d.org/sample/13-NTK-045-WHT
