# Supplementary material for: Thickness of the divide and flank of the West Antarctic Ice Sheet through the last deglaciation
Source: Copernicus journal article supplement (doi:10.5194/tc-13-3061-2019), 2019-11-20
Supplement: Supplementary file [file tc-13-3061-2019-supplement-title-page.pdf › tc-13-3061-2019-supplement-title-page.pdf]

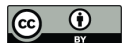

## *Supplement of*

# **Thickness of the divide and flank of the West Antarctic Ice Sheet through the last deglaciation**

**Perry Spector et al.**

*Correspondence to:* Perry Spector ([pspector@bgc.org](mailto:pspector@bgc.org))

- [tc-13-3061-2019-supplement-title-page.pdf](#)
- [Spector2019\\_supplement\\_v2](#)
  - [Spector2019\\_supplement.pdf](#)
  - [data\\_table\\_v2.xlsx](#)

The copyright of individual parts of the supplement might differ from the CC BY 4.0 License.
